## Age-related characteristics of infective endocarditis: prospective data from the Euro-Endo registry

M. Pazdernik<sup>1</sup>, C. Selton-Suty<sup>2</sup>, P. Lancellotti<sup>3</sup>, W.K.F. Kong<sup>4</sup>, I. Srdanovic<sup>5</sup>, H. Yamada<sup>6</sup>, R.K. Riezebos<sup>7</sup>, A. De Martino<sup>8</sup>, L. Pierard<sup>9</sup>, M. Nunes<sup>10</sup>, M. Haertel Miglioranza<sup>11</sup>, J. Magne<sup>12</sup>, B. Mutlu<sup>13</sup>, G. Habib<sup>14</sup>, B. Lung<sup>15</sup>

<sup>1</sup>Institute for Clinical and Experimental Medicine (IKEM), Prague, Czechia; <sup>2</sup>CHU Nancy-Brabois, University Hospital of Nancy-Brabois, Nancy, France; <sup>3</sup>University Hospital of Liege (CHU), Liege, Belgium; <sup>4</sup>National Heart Centre Singapore, Singapore, Singapore; <sup>5</sup>Institute for Cardiovascular Diseases of Vojvodina, Novi Sad, Serbia; <sup>6</sup>Tokushima University Graduate School of Biomedical Sciences, Tokushima, Japan; <sup>7</sup>Heart center, OLVG, Amsterdam, Netherlands (The); <sup>8</sup>University Hospital of Pisa, Pisa, Italy; <sup>9</sup>University Hospital Sart Tilman, Liege, Belgium; <sup>10</sup>Federal University of Minas Gerais, Belo Horizonte, Brazil; <sup>11</sup>Institute of Cardiology / University Foundation, Porto Alegre, Brazil; <sup>12</sup>Dupuytren University Hospital Centre Limoges, Limoges, France; <sup>13</sup>Marmara University Hospital, Pendik, Istanbul, Turkey; <sup>14</sup>APHM, La Timone Hospital, Marseille, France; <sup>15</sup>Bichat Hospital, APHP, Université de Paris, Paris, France

On behalf of EURO-ENDO investigators

**Funding Acknowledgement:** Type of funding source: Other. Main funding source(s): EORP grant

**Introduction:** The profile of infective endocarditis (IE) is continuously evolving over time, and this may probably be partly due to increasing age of the patients.

**Methods:** All data were collected from the EURO-ENDO registry, which is a one-year prospective international multicentre observational survey on patients with definite or possible IE included between 2016 and 2018. Subjects were stratified into 3 groups according to their age at index hospitalization.

**Results:** Among the 3113 patients included, 1670 patients (54%, Young group) were <65, 1068 (34%, Medium group) between 65 and 80 and 375 (12%, Old group) ≥80 years old. The most striking age-related differences were (old group vs others) (table 1) 1) the higher comorbidity burden and Charlson index; 2) the lower rate of embolic events on admission and under therapy; 3) the higher rate of Enterococci and digestive streptococci; 4) the

lower rate of surgery during acute IE despite a theoretical indication; 5) the higher in-hospital and 1-year mortality. With regards to surgery, young and medium age were predictive of more frequent performance of surgery as compared to old age (Young: OR 4.33, 95% CI [3.09–6.06], Medium: 3.62, [2.57–5.10],  $p < 0.001$ ). In multivariable analysis, age per se was not predictive of in-hospital and 1yr FU mortality, but lack of surgical procedures when indicated (27% of the old group), was strongly predictive.

**Conclusion:** This is the largest contemporary registry showing the strong influence of age on the demographic, clinical, therapeutic, and prognostic profile of IE. Non-performance of surgical procedures when indicated is frequent in old patients and is a strong predictor of mortality while age per se is not. Endocarditis Teams should take these results into account when considering surgery in elderly patients.

Table 1. Comparison of patient characteristics and outcome according to age

|                                          | <65 year<br>(n=1670) | 65–80 years<br>(n=1068) | ≥80 years<br>(n=375) | p       |
|------------------------------------------|----------------------|-------------------------|----------------------|---------|
| Charlson index (mean ± SD)               | 1.96±2.13            | 4.87±2.56               | 6.23±2.85            | <0.0001 |
| Embolic events at admission (%)          | 30.4                 | 21.2                    | 15.5                 | <0.0001 |
| Embolic events under therapy (%)         | 22.4                 | 20.5                    | 12.8                 | 0.0002  |
| Enterococcus (%)                         | 10.5                 | 20.4                    | 24.2                 | <0.0001 |
| Streptococcus bovis (%)                  | 4.9                  | 8.0                     | 9.3                  | 0.002   |
| Intervention Indicated and performed (%) | 78.2                 | 76.2                    | 44.7                 | <0.0001 |
| In-hospital death (%)                    | 13.8                 | 18.9                    | 25.9                 | <0.0001 |
| Death at 1 year (%)                      | 19.2                 | 27.0                    | 41.3                 | <0.0001 |
